# Supplementary material for: Enhancing performance of lithium metal batteries through acoustic field application
Source: Royal Society of Chemistry journal article supplement (doi:10.1039/d4ta07087a), 2024-12-10
Supplement: d4ta07087a1.pdf [file d4ta07087a1.pdf]

Supporting information for

## **Enhancing Performance of Lithium Metal Batteries through Acoustic Field Application**

Qipeng Zhang,<sup>a</sup> Luyu Bo,<sup>a</sup> Hao Li,<sup>a</sup> Jiali Li,<sup>a</sup> Teng Li,<sup>a</sup> Zhenhua Tian,<sup>\*a</sup>  
and Rui Qiao<sup>\*a</sup>

<sup>a</sup> Department of Mechanical Engineering, Virginia Polytechnic Institute  
and State University, Blacksburg, Virginia 24061, United States, USA

\*E-mail: [tianz@vt.edu](mailto:tianz@vt.edu) (Zhenhua Tian) [ruiqiao@vt.edu](mailto:ruiqiao@vt.edu) (R.Q.)

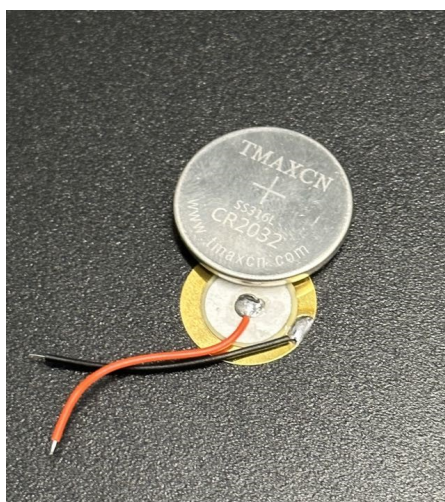

**Figure S1.** Photo of the test setup with a piezoelectric transducer and battery configuration.

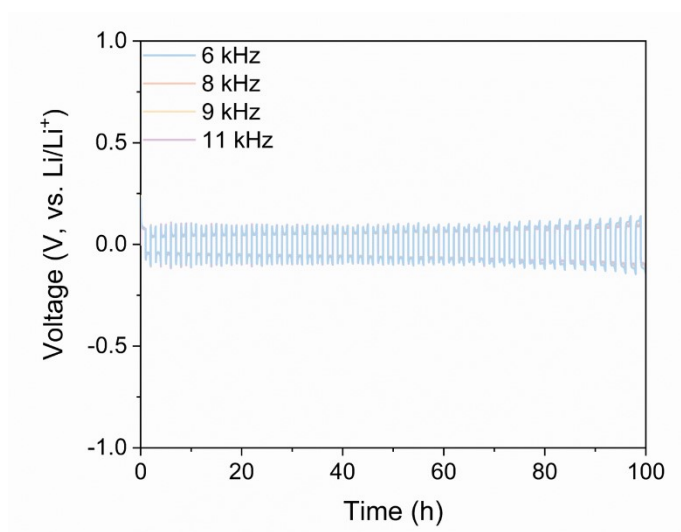

**Figure S2.** Voltage-time curves of Li | Li symmetrical coin cells at different frequencies.

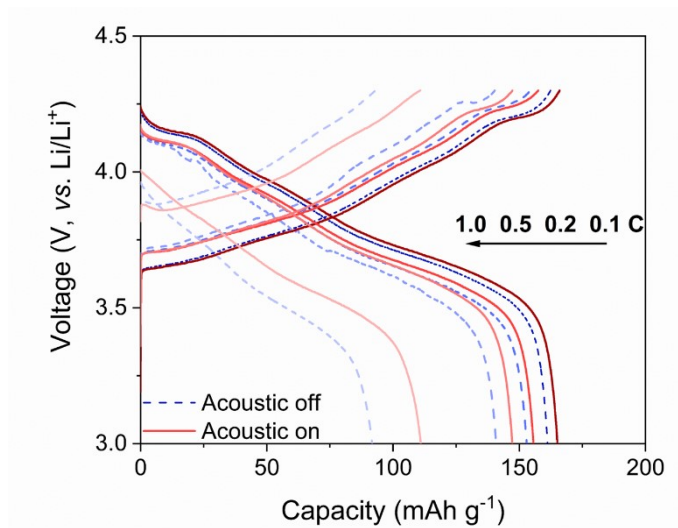

**Figure S3.** Comparative rate performance of the cells, with corresponding voltage profiles.

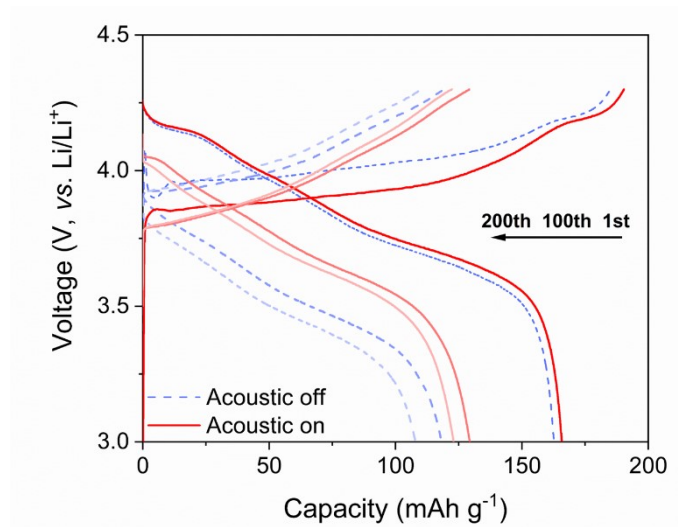

**Figure S4.** Voltage profiles associated with the cycling performance data.

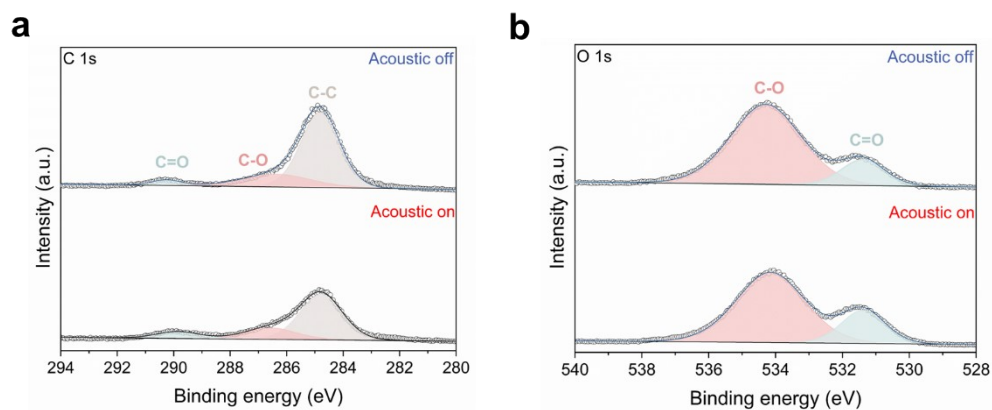

**Figure S5.** C 1s and O 1s spectra of the SEI film on lithium anodes surface after cycling.

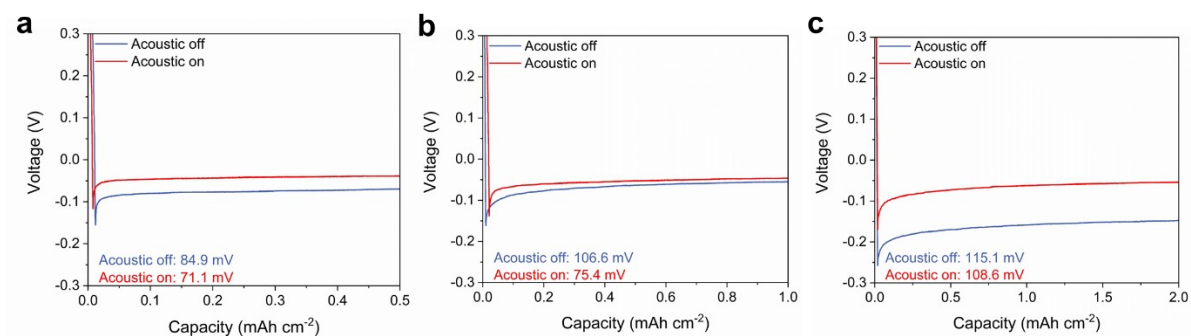

**Figure S6.** Comparison of nucleation overpotentials for Li | Cu cells with and without acoustics at current densities of 0.5 mA cm<sup>-2</sup> (a), 1.0 mA cm<sup>-2</sup> (b), and 2.0 mA cm<sup>-2</sup> (c).

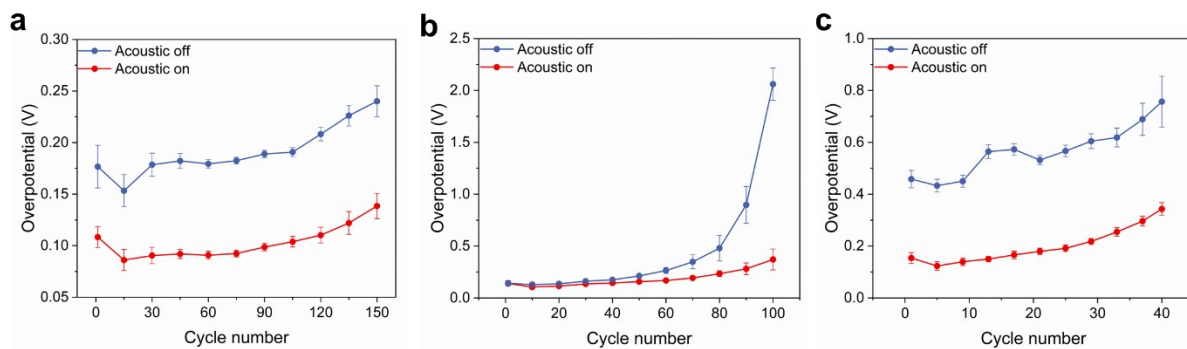

**Figure S7.** Overpotential-cycle number curves of Li | Li symmetrical batteries with and without an acoustic field at current densities of  $0.5 \text{ mA cm}^{-2}$  (a),  $1.0 \text{ mA cm}^{-2}$  (b), and  $2.0 \text{ mA cm}^{-2}$  (c).

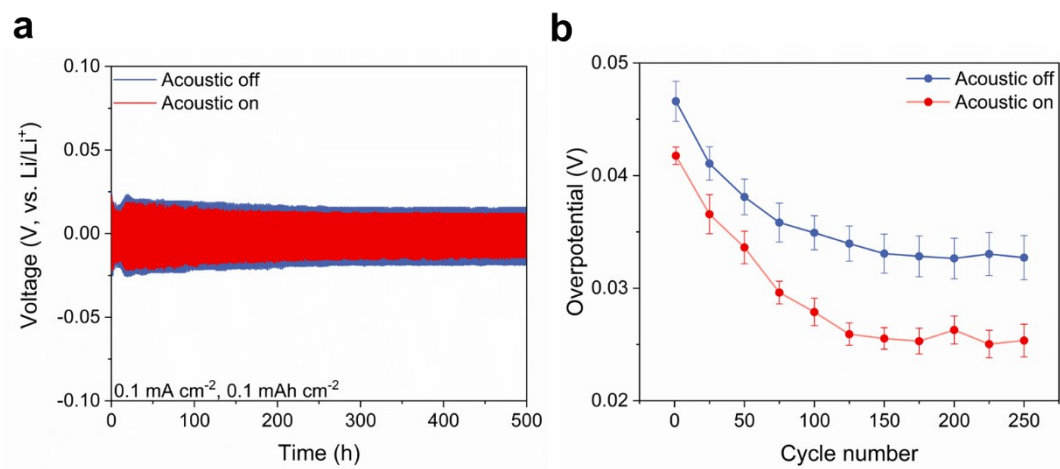

**Figure S8.** (a) Voltage-time and (b) overpotential-cycle number curves of Li | Li symmetrical coin cells at  $0.1 \text{ mA cm}^{-2}$ .

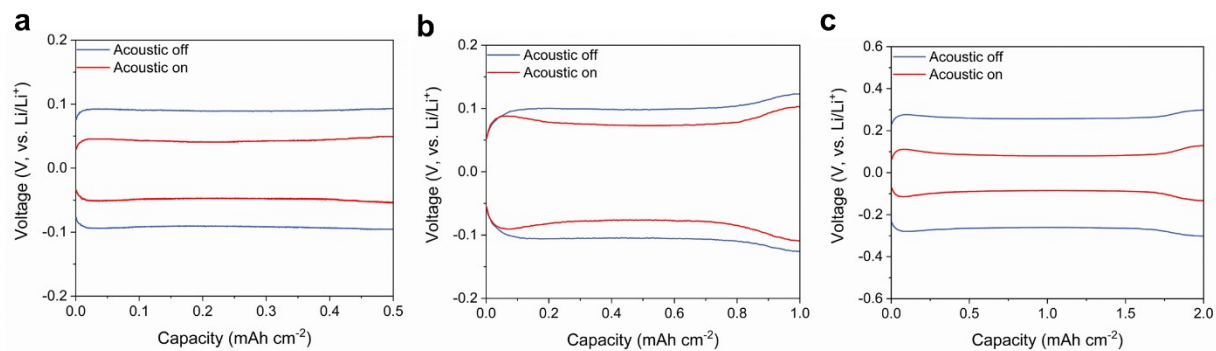

**Figure S9.** The voltage profiles of Li | Li symmetrical batteries w/o acoustics at current density of 0.5 mA cm<sup>-2</sup> (a), 1.0 mA cm<sup>-2</sup> (b), and 2.0 mA cm<sup>-2</sup> (c).

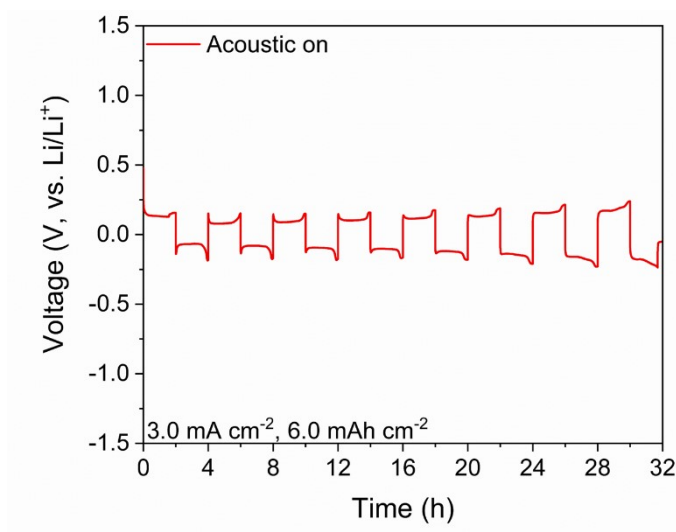

**Figure S10.** Voltage-time curves of Li | Li symmetrical coin cells at 3.0 mA cm<sup>-2</sup> and an areal capacity of 6.0 mAh cm<sup>-2</sup>.

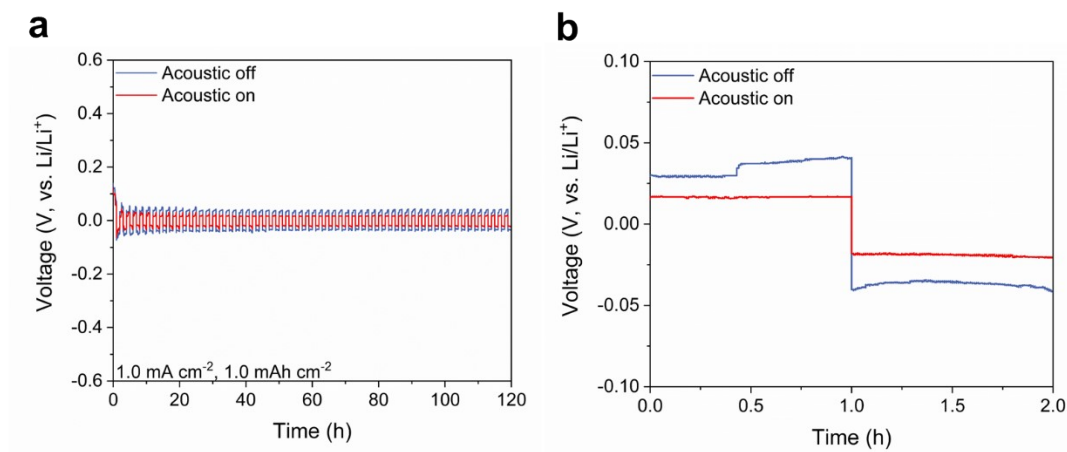

**Figure S11.** (a) Voltage-time curves of Li | Li symmetrical coin cells with DME/DOL electrolyte at  $1.0 \text{ mA cm}^{-2}$ , and (b) the corresponding overpotential-time curve.

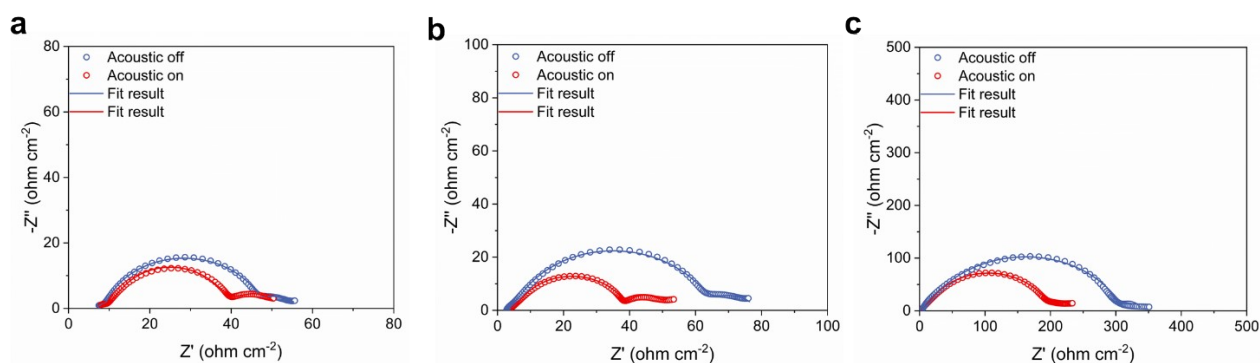

**Figure S12.** Electrochemical impedance spectroscopy (EIS) of symmetric Li cells after cycling w/o acoustics after cycling.
